# Supplementary material for: Keratins and plakin family cytolinker proteins control the length of epithelial microridge protrusions
Source: eLife. 2020 Sep 7;9:e58149. doi: 10.7554/eLife.58149 (PMC7535935; doi:10.7554/eLife.58149)
Supplement: Supplementary file 1. — (A) Table of p-values comparing microridge length per cell between the indicated genotypes (as in Figure 4B) with the Wilcoxon rank-sum test. (B) Table of p-values comparing microridge length per cell, averaged for each animal (see Figure 4—figure supplement 2A), between the indicated genotypes with the Wilcoxon rank-sum test. (C) Table of p-values comparing pooled microridge length distributions between the indicated genotypes (as in Figure 4—figure supplement 2B) with the Wilcoxon rank-sum test. (D) Table of p-values comparing microridge cell areas between the indicated genotypes (as in Figure 4—figure supplement 2C) with the Wilcoxon rank-sum test. Black font indicates p-values>0.05 and red font indicates p-values<0.05. [file elife-58149-supp1.xlsx]

## Sheet: Sheet1
A
Average microridge length per cell
		WT	evpl+/-	ppl+/-	evpl+/-;ppl+/-	evpl-/-	ppl-/-
	evpl+/-	2.9e-08	-	-	-	-	-
	ppl+/-	0.0283	0.0051	-	-	-	-
	evpl+/-;ppl+/-	1.1e-13	1.4e-05	1.4e-07	-	-	-
	evpl-/-	< 2E-16	< 2E-16	4e-14	5.9e-09	-	-
	ppl-/-	5.2e-16	< 2E-16	< 2E-16	< 2E-16	5.1e-10	-
	evpl-/-;ppl-/-	< 2E-16	4.2e-16	1.7e-14	5.6e-16	1.8e-11	0.3304
B
Average microridge length per cell averaged for each fish
		WT	evpl+/-	ppl+/-	evpl+/-;ppl+/-	evpl-/-	ppl-/-
	evpl+/-	0.0109	-	-	-	-	-
	ppl+/-	0.02671	0.1172	-	-	-	-
	evpl+/-;ppl+/-	0.0088	0.0332	0.0398	-	-	-
	evpl-/-	0.0022	0.0047	0.0088	0.0109	-	-
	ppl-/-	0.0047	0.0088	0.0152	0.0109	0.0177	-
	evpl-/-;ppl-/-	0.0147	0.0269	0.0333	0.0333	0.0412	1
C
Microridge length distribution
		WT	evpl+/-	ppl+/-	evpl+/-;ppl+/-	evpl-/-	ppl-/-
	evpl+/-	< 2E-16	-	-	-	-	-
	ppl+/-	< 2E-16	0.2	-	-	-	-
	evpl+/-;ppl+/-	< 2E-16	< 2E-16	< 2E-16	-	-	-
	evpl-/-	< 2E-16	< 2E-16	< 2E-16	< 2E-16	-	-
	ppl-/-	< 2E-16	< 2E-16	< 2E-16	< 2E-16	< 2E-16	-
	evpl-/-;ppl-/-	< 2E-16	< 2E-16	< 2E-16	< 2E-16	< 2E-16	6.2e-12
D
Apical area
		WT	evpl+/-	ppl+/-	evpl+/-;ppl+/-	evpl-/-	ppl-/-
	evpl+/-	0.94909	-	-	-	-	-
	ppl+/-	0.74965	0.74965	-	-	-	-
	evpl+/-;ppl+/-	0.69828	0.57537	0.94909	-	-	-
	evpl-/-	0.18189	0.17235	0.74965	0.69828	-	-
	ppl-/-	0.94909	0.94909	0.77843	0.74965	0.37202	-
	evpl-/-;ppl-/-	7.7e-08	7.3e-07	1.7e-05	4.3e-07	7.7e-09	0.00014
